# Supplementary material for: Toxoplasmosis-associated IRIS involving the CNS: a case report with longitudinal analysis of T cell subsets
Source: Springer Nature journal article supplement (doi:10.1186/s12879-016-2159-x), 2017-01-13
Supplement: MOESM1 [file 11998302]

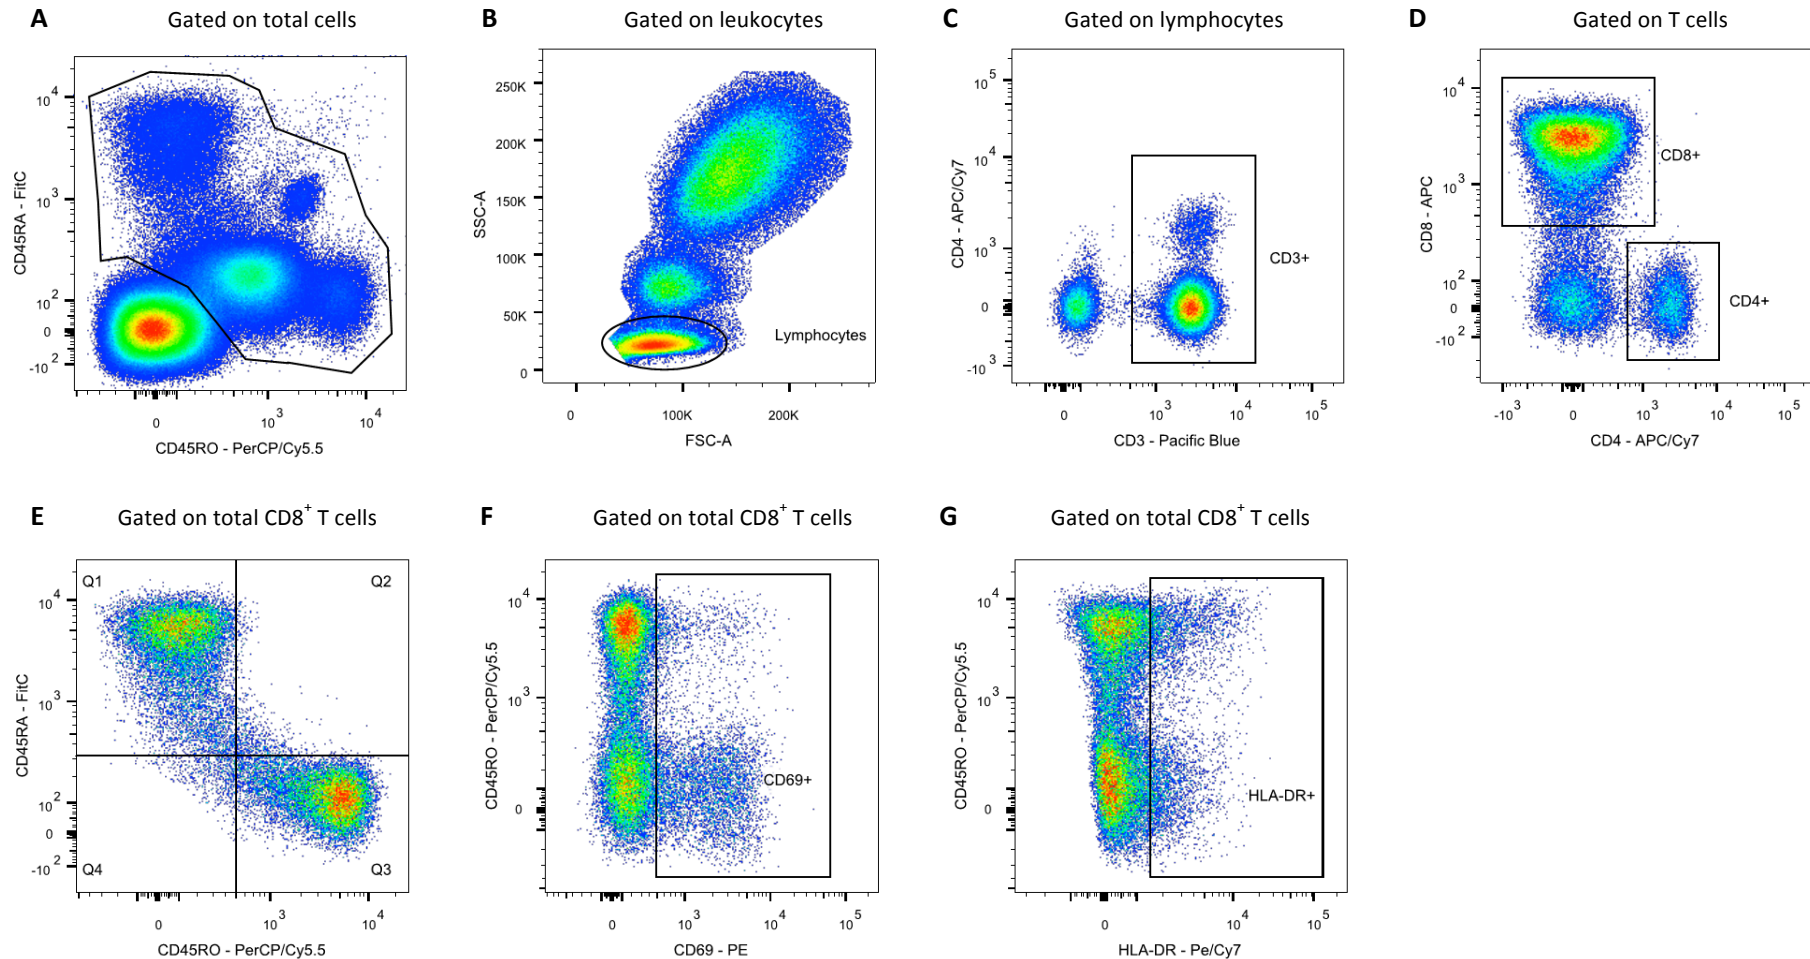

**Figure S1. Flow cytometry gating strategy for analysis of T cell subsets.** A representative example of the gating strategy used for the phenotypic characterization is shown. Cellular debris and non-leucocytes were excluded as  $CD45RA^-CD45RO^-$  (A); among leucocytes ( $CD45RA^+$  and/or  $CD45RO^+$ ), lymphocytes were identified based on FSC/SSC profile (B). T cells ( $CD3^+$ ) were selected from lymphocytes (C) and divided in  $CD4^+$  and  $CD8^+$  cells (D). Naïve and memory T cells were defined as  $CD45RA^+CD45RO^-$  and  $CD45RA^-CD45RO^+$ , respectively, among  $CD8^+$  T cells (E). Expression of the activation markers CD69 and HLA-DR was analyzed among total  $CD8^+$  cells (H and I). Gates from naïve, memory, HLA-DR<sup>+</sup> and CD69<sup>+</sup> cells were transposed to  $CD4^+$  T cells (not shown).

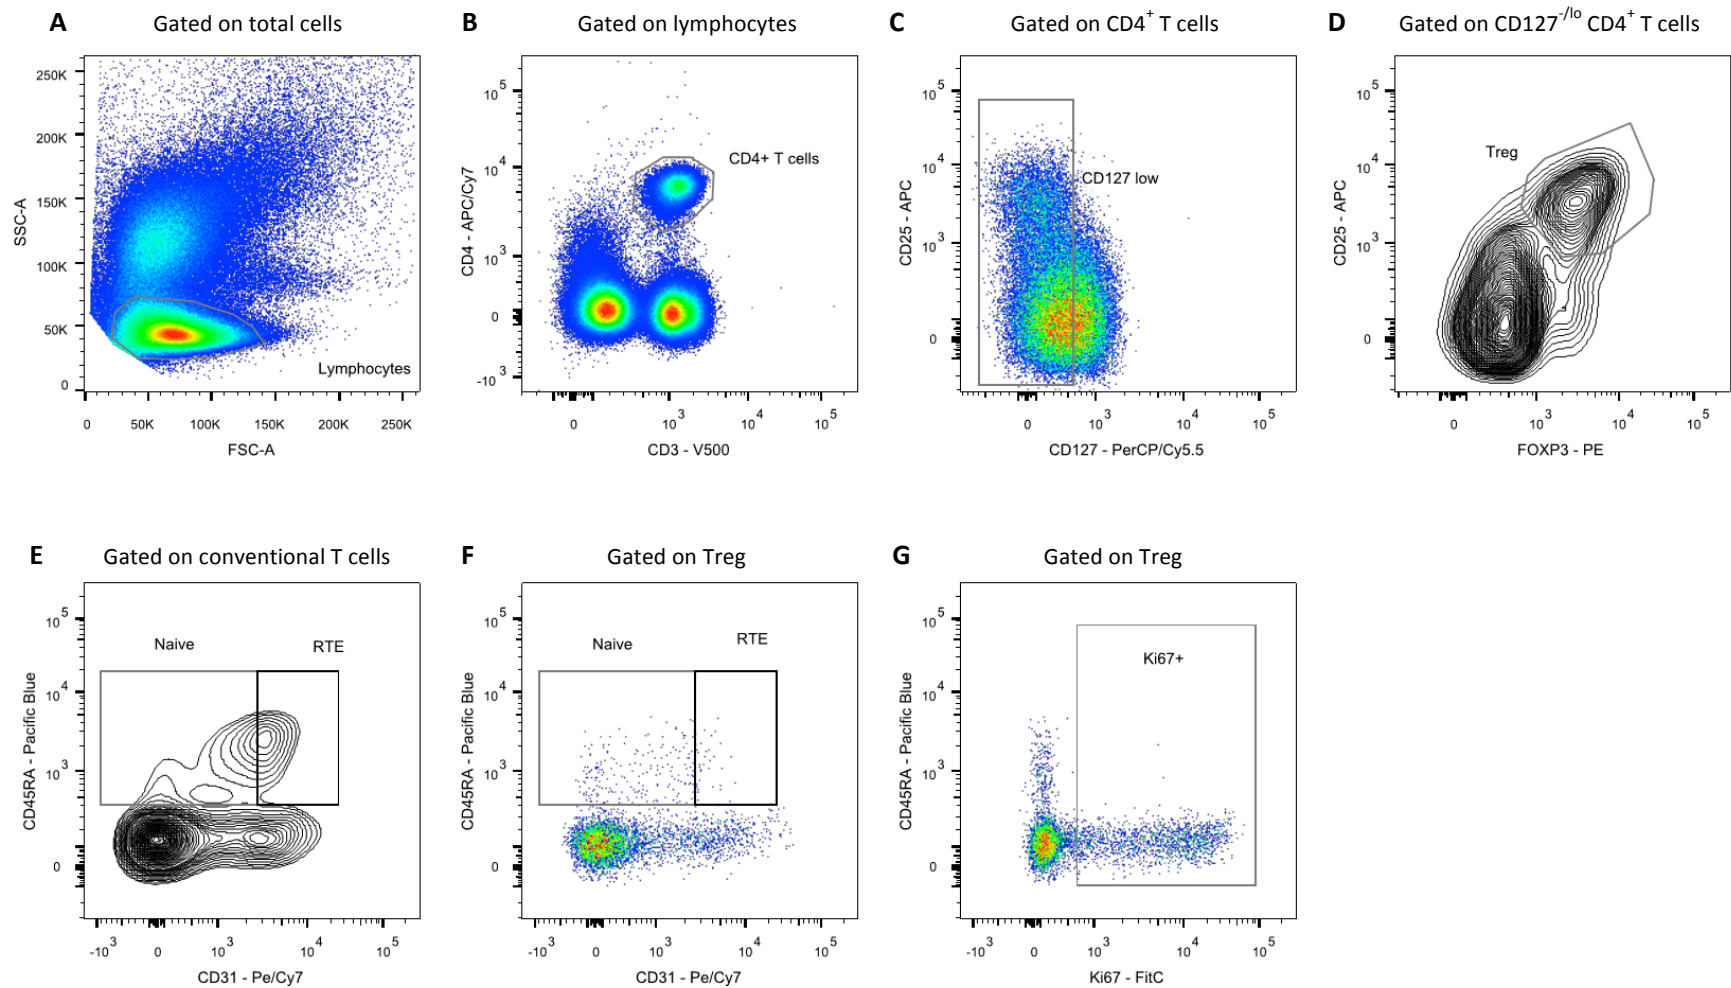

**Figure S2. Flow cytometry gating strategy for analysis of regulatory T cells (Treg).** A representative example of the gating strategy used for the phenotypic characterization of Treg is shown. Lymphocytes were identified based on FSC/SSC profile (**A**) and CD4<sup>+</sup> T cells (CD4<sup>+</sup>CD3<sup>+</sup>) were selected within these (**B**). Treg were defined as CD127<sup>-/low</sup> CD4<sup>+</sup> T cells (**C**) that were CD25<sup>+</sup>FOXP3<sup>+</sup> (**D**). Conventional T cells (Tconv) were defined using a “no gate” from Treg (not shown). Naïve (CD45RA<sup>+</sup>) and recent thymic emigrant cells (CD45RA<sup>+</sup> CD31<sup>hi</sup>) were selected within conventional T cells (**E**) and gates were transposed to Treg (**F**). Ki67 expression was analyzed within Treg (**G**).

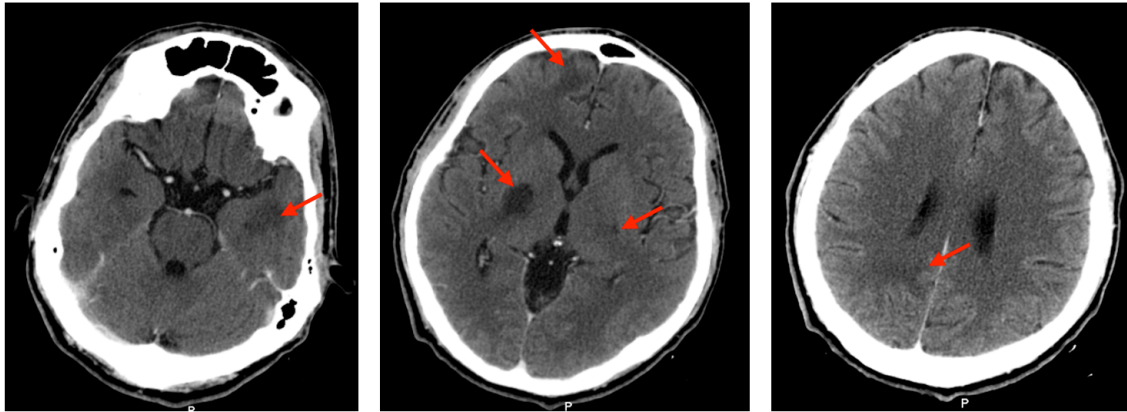

**Figure S3. Brain CT performed after 14 days under specific anti-toxoplasma therapy, after contrast injection.** Improvement of previous lesions is seen; mass effect and ring contrast enhancement are no longer evident.

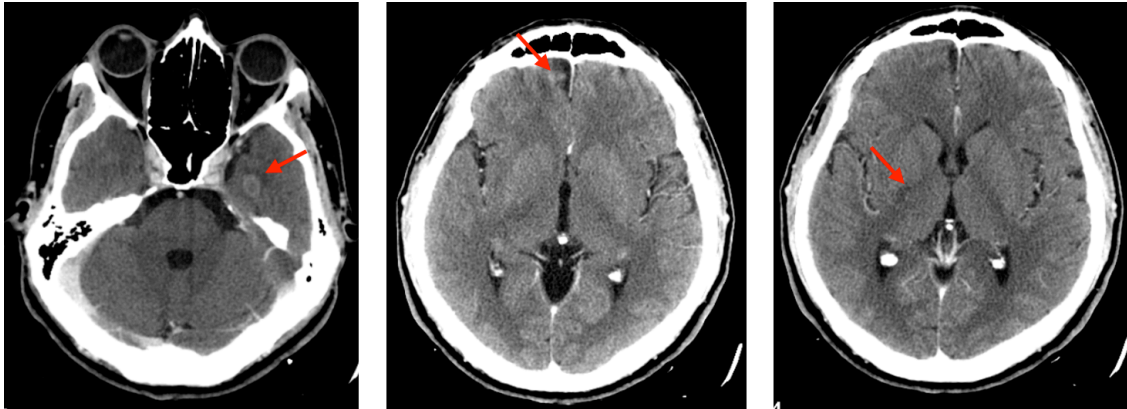

**Figure S4. Brain CT performed after hospital admission, after contrast injection.** Several hypo-density lesions are present, some of them with slight perilesional edema and ring enhancement.

**Table S1:** Comparison between the T cell subsets dynamics of control group and the patient with toxoplasmosis associated CNS-IRIS.

|                                 |                  | Baseline                                        |                       | 1 Month                     |                          |                       | 2 Months                    |                       |                       | 3 Months                    |                       |                       | 6 Months                    |                       |                       |                             |                          |
|---------------------------------|------------------|-------------------------------------------------|-----------------------|-----------------------------|--------------------------|-----------------------|-----------------------------|-----------------------|-----------------------|-----------------------------|-----------------------|-----------------------|-----------------------------|-----------------------|-----------------------|-----------------------------|--------------------------|
|                                 |                  | Case                                            | Controls <sup>1</sup> | <i>p</i> value <sup>2</sup> | Case                     | Controls <sup>1</sup> | <i>p</i> value <sup>2</sup> | Case                  | Controls <sup>1</sup> | <i>p</i> value <sup>2</sup> | Case                  | Controls <sup>1</sup> | <i>p</i> value <sup>2</sup> | Case                  | Controls <sup>1</sup> | <i>p</i> value <sup>2</sup> |                          |
| Absolute count (cells/ $\mu$ L) | CD4 <sup>+</sup> | Total CD4 <sup>+</sup>                          | 20.0                  | 38.3 $\pm$ 30.7             | <i>p</i> =0.111          | 67.0                  | 109.0 $\pm$ 65.2            | <i>p</i> =0.223       | 143.0                 | 137.2 $\pm$ 58.9            | <i>p</i> =0.776       | 128.0                 | 107.4 $\pm$ 57.9            | <i>p</i> =0.471       | 165.0                 | 136.1 $\pm$ 44.6            | <i>p</i> =0.088          |
|                                 |                  | Naïve                                           | 3.2                   | 3.4 $\pm$ 3.3               | <i>p</i> =0.885          | 0.4                   | 9.6 $\pm$ 10.6              | <i>p</i> =0.122       | 1.0                   | 7.1 $\pm$ 7.8               | <b><i>p</i>=0.048</b> | 3.2                   | 8.2 $\pm$ 6.8               | <i>p</i> =0.172       | 26.2                  | 15.3 $\pm$ 11.7             | <b><i>p</i>=0.024</b>    |
|                                 |                  | Memory                                          | 14.0                  | 32.5 $\pm$ 26.6             | <i>p</i> =0.071          | 65.1                  | 92.7 $\pm$ 53.9             | <i>p</i> =0.316       | 137.6                 | 124.4 $\pm$ 54.1            | <i>p</i> =0.484       | 122.2                 | 89.0 $\pm$ 47.9             | <i>p</i> =0.196       | 129.4                 | 112.9 $\pm$ 37.8            | <i>p</i> =0.226          |
|                                 |                  | CD69 <sup>+</sup>                               | 7.1                   | 7.4 $\pm$ 9.2               | <i>p</i> =0.933          | 15.4                  | 19.8 $\pm$ 22.2             | <i>p</i> =0.679       | 5.0                   | 12.6 $\pm$ 6.6              | <b><i>p</i>=0.009</b> | 23.2                  | 15.5 $\pm$ 8.9              | <i>p</i> =0.126       | 31.7                  | 15.4 $\pm$ 8.1              | <b><i>p</i>&lt;0.001</b> |
|                                 |                  | HLA-DR <sup>+</sup>                             | 13.8                  | 15.5 $\pm$ 15.5             | <i>p</i> =0.748          | 38.3                  | 45.9 $\pm$ 40.4             | <i>p</i> =0.697       | 51.5                  | 60.2 $\pm$ 29.9             | <i>p</i> =0.408       | 79.5                  | 43.4 $\pm$ 25.8             | <b><i>p</i>=0.035</b> | 53.1                  | 40.8 $\pm$ 13.3             | <b><i>p</i>=0.025</b>    |
|                                 | CD8 <sup>+</sup> | Total CD8 <sup>+</sup>                          | 1186.0                | 746.6 $\pm$ 415.0           | <b><i>p</i>=0.013</b>    | 1078.0                | 1288.8 $\pm$ 537.6          | <i>p</i> =0.430       | 1308.0                | 1087.0 $\pm$ 448.7          | <i>p</i> =0.178       | 852.0                 | 920.4 $\pm$ 384.8           | <i>p</i> =0.711       | 1132.0                | 957.6 $\pm$ 590.9           | <i>p</i> =0.402          |
|                                 |                  | Naïve                                           | 498.0                 | 207.1 $\pm$ 155.2           | <b><i>p</i>&lt;0.001</b> | 538.0                 | 377.8 $\pm$ 203.8           | <i>p</i> =0.154       | 695.0                 | 329.8 $\pm$ 226.5           | <b><i>p</i>=0.001</b> | 344.0                 | 297.6 $\pm$ 219.0           | <i>p</i> =0.660       | 503.0                 | 326.4 $\pm$ 256.1           | <i>p</i> =0.104          |
|                                 |                  | Memory                                          | 442.0                 | 391.0<br>[191.0; 1446.0]    | <i>p</i> =0.314          | 314.0                 | 780.0 $\pm$ 646.7           | <i>p</i> =0.182       | 419.0                 | 458.0<br>[155.0; 1447.0]    | <i>p</i> =0.214       | 244.0                 | 313.0<br>[216.0 ; 977.0]    | <i>p</i> =0.080       | 237.0                 | 462.3 $\pm$ 296.3           | <i>p</i> =0.052          |
|                                 |                  | CD69 <sup>+</sup>                               | 248.0                 | 173.8 $\pm$ 103.4           | <i>p</i> =0.063          | 232.0                 | 266.2 $\pm$ 154.0           | <i>p</i> =0.645       | 84.0                  | 154.8 $\pm$ 64.0            | <b><i>p</i>=0.011</b> | 159.0                 | 184.6 $\pm$ 118.0           | <i>p</i> =0.653       | 191.0                 | 138.1 $\pm$ 83.1            | <i>p</i> =0.093          |
|                                 |                  | HLA-DR <sup>+</sup>                             | 306.0                 | 170.0<br>[28.9; 966.0]      | <i>p</i> =0.110          | 344.0                 | 210.0<br>[181.0; 837.0]     | <i>p</i> =0.686       | 229.0                 | 333.9 $\pm$ 220.5           | <i>p</i> =0.191       | 264.0                 | 195.0<br>[140.0; 666.0]     | <i>p</i> =0.500       | 307.0                 | 235.7 $\pm$ 193.3           | <i>p</i> =0.300          |
| Percentage (%)                  | CD4 <sup>+</sup> | Naïve (% among CD4 <sup>+</sup> )               | 15.9                  | 9.9 $\pm$ 8.7               | <i>p</i> =0.073          | 0.6                   | 5.1 $\pm$ 5.4               | <b><i>p</i>=0.050</b> | 0.7                   | 4.6 $\pm$ 4.8               | <b><i>p</i>=0.041</b> | 2.5                   | 5.2 $\pm$ 4.1               | <i>p</i> =0.083       | 15.9                  | 10.5 $\pm$ 7.2              | <i>p</i> =0.053          |
|                                 |                  | Memory (% among CD4 <sup>+</sup> )              | 69.9                  | 81.9 $\pm$ 10.9             | <b><i>p</i>=0.011</b>    | 97.1                  | 89.5 $\pm$ 7.8              | <b><i>p</i>=0.029</b> | 96.2                  | 93.3<br>[75.5; 97.5]        | <b><i>p</i>=0.015</b> | 95.5                  | 92.2<br>[71.3; 95.0]        | <b><i>p</i>=0.008</b> | 78.4                  | 83.6 $\pm$ 10.0             | <i>p</i> =0.155          |
|                                 |                  | CD69 <sup>+</sup> (% among CD4 <sup>+</sup> )   | 35.7                  | 16.0 $\pm$ 7.9              | <b><i>p</i>&lt;0.001</b> | 23.0                  | 10.0<br>[6.6; 38.3]         | <i>p</i> =0.069       | 3.5                   | 9.9 $\pm$ 5.2               | <b><i>p</i>=0.006</b> | 18.1                  | 11.8 $\pm$ 5.1              | <b><i>p</i>=0.006</b> | 19.2                  | 9.3<br>[7.2; 21.5]          | <b><i>p</i>=0.021</b>    |
|                                 |                  | HLA-DR <sup>+</sup> (% among CD4 <sup>+</sup> ) | 69.0                  | 36.8 $\pm$ 15.1             | <b><i>p</i>&lt;0.001</b> | 57.2                  | 42.2 $\pm$ 19.1             | <i>p</i> =0.061       | 36.0                  | 43.9 $\pm$ 10.1             | <b><i>p</i>=0.046</b> | 62.1                  | 39.2 $\pm$ 14.5             | <b><i>p</i>=0.001</b> | 32.2                  | 32.1 $\pm$ 10.9             | <i>p</i> =0.986          |
|                                 | CD8 <sup>+</sup> | Naïve (% among CD8 <sup>+</sup> )               | 42.0                  | 31.0 $\pm$ 18.3             | <i>p</i> =0.107          | 49.9                  | 32.5 $\pm$ 21.01            | <i>p</i> =0.052       | 53.1                  | 31.4 $\pm$ 19.9             | <b><i>p</i>=0.011</b> | 40.4                  | 32.9 $\pm$ 20.3             | <i>p</i> =0.300       | 44.4                  | 34.1 $\pm$ 19.7             | <i>p</i> =0.155          |
|                                 |                  | Memory (% among CD8 <sup>+</sup> )              | 37.3                  | 48.4<br>[39.2;85.3]         | <b><i>p</i>=0.008</b>    | 29.1                  | 57.4 $\pm$ 24.4             | <b><i>p</i>=0.014</b> | 32.0                  | 55.2 $\pm$ 18.8             | <b><i>p</i>=0.006</b> | 28.6                  | 50.5 $\pm$ 15.4             | <b><i>p</i>=0.003</b> | 20.9                  | 50.0 $\pm$ 17.8             | <b><i>p</i>=0.001</b>    |
|                                 |                  | CD69 <sup>+</sup> (% among CD8 <sup>+</sup> )   | 20.9                  | 23.7 $\pm$ 7.0              | <i>p</i> =0.262          | 21.5                  | 17.7<br>[11.5; 37.2]        | <i>p</i> =0.208       | 6.4                   | 15.0 $\pm$ 5.6              | <b><i>p</i>=0.002</b> | 18.7                  | 15.8 $\pm$ 5.5              | <i>p</i> =0.151       | 16.9                  | 11.9<br>[10.9; 24.0]        | <i>p</i> =0.173          |
|                                 |                  | HLA-DR <sup>+</sup> (% among CD8 <sup>+</sup> ) | 25.8                  | 27.3 $\pm$ 14.1             | <i>p</i> =0.752          | 31.9                  | 30.6 $\pm$ 19.0             | <i>p</i> =0.856       | 17.5                  | 29.8 $\pm$ 10.7             | <b><i>p</i>=0.009</b> | 31.0                  | 25.8 $\pm$ 8.8              | <i>p</i> =0.116       | 27.1                  | 22.0<br>[9.7; 50.3]         | <i>p</i> =0.110          |

<sup>1</sup> Mean  $\pm$  SD are represented for variables normally distributed; median and [min; max] are represented for the variables not normally distributed.

<sup>2</sup> For normally distributed variables, comparison of the control group with the clinical case was performed by one-sample T-test; for the other variables a one-sample Wilcoxon signed rank test was applied. Cells in bold show significant differences (*p*<0.05) between the value of the clinical case and the mean/median of the control group.

**Table S2:** Comparison between regulatory T cell (Treg) subsets dynamics of control group and the patient with toxoplasmosis associated CNS-IRIS.

|                                    |                                     | Baseline |                       |                             | 1 Month |                       |                             | 2 Months |                       |                             | 3 Months |                       |                             | 6 Months |                       |                             |
|------------------------------------|-------------------------------------|----------|-----------------------|-----------------------------|---------|-----------------------|-----------------------------|----------|-----------------------|-----------------------------|----------|-----------------------|-----------------------------|----------|-----------------------|-----------------------------|
|                                    |                                     | Case     | Controls <sup>1</sup> | <i>p</i> value <sup>2</sup> | Case    | Controls <sup>1</sup> | <i>p</i> value <sup>2</sup> | Case     | Controls <sup>1</sup> | <i>p</i> value <sup>2</sup> | Case     | Controls <sup>1</sup> | <i>p</i> value <sup>2</sup> | Case     | Controls <sup>1</sup> | <i>p</i> value <sup>2</sup> |
| Absolute count<br>(cells/ $\mu$ L) | Treg                                | 3.2      | 6.1 $\pm$ 5.1         | <i>p</i> =0.155             | 4.9     | 12.4 $\pm$ 5.8        | <b><i>p</i>=0.044</b>       | 17.4     | 23.7 $\pm$ 18.0       | <i>p</i> =0.325             | 27.6     | 12.3 $\pm$ 6.8        | <b><i>p</i>=0.007</b>       | 22.1     | 15.8 $\pm$ 7.5        | <b><i>p</i>=0.036</b>       |
|                                    | Naïve Treg                          | 1.1      | 0.1 $\pm$ 0.1         | <b><i>p</i>&lt;0.001</b>    | 0.2     | 0.5 $\pm$ 0.4         | <i>p</i> =0.154             | 0.6      | 1.3 $\pm$ 1.0         | <i>p</i> =0.086             | 3.8      | 0.9 $\pm$ 1.1         | <b><i>p</i>=0.005</b>       | 3.23     | 1.5 $\pm$ 1.6         | <b><i>p</i>=0.015</b>       |
|                                    | RTE Treg                            | 0.8      | 0.0 $\pm$ 0.1         | <b><i>p</i>&lt;0.001</b>    | 0.2     | 0.2 $\pm$ 0.1         | <i>p</i> =0.955             | 0.4      | 0.4 $\pm$ 0.3         | <i>p</i> =0.824             | 1.0      | 0.3 $\pm$ 0.3         | <b><i>p</i>=0.012</b>       | 0.8      | 0.4 $\pm$ 0.6         | <i>p</i> =0.117             |
|                                    | Ki67 <sup>+</sup> Treg              | 0.9      | 1.3 $\pm$ 1.2         | <i>p</i> =0.514             | 2.2     | 3.6 $\pm$ 2.2         | <i>p</i> =0.230             | 5.51     | 4.8 $\pm$ 3.3         | <i>p</i> =0.622             | 3.2      | 2.9 $\pm$ 1.9         | <i>p</i> =0.781             | 5.66     | 2.8 $\pm$ 1.3         | <b><i>p</i>&lt;0.001</b>    |
| Percentage (%)                     | Treg<br>(% among CD4 <sup>+</sup> ) | 16.2     | 19.4 $\pm$ 9.4        | <i>p</i> =0.362             | 7.4     | 18.9 $\pm$ 10.5       | <b><i>p</i>=0.024</b>       | 12.2     | 16.4<br>[3.6; 38.7]   | <i>p</i> =0.374             | 21.6     | 12.7<br>[8.9; 48.6]   | <i>p</i> =0.110             | 13.4     | 12.3 $\pm$ 5.7        | <i>p</i> =0.569             |
|                                    | Naïve<br>(% among Treg)             | 33.6     | 1.7 $\pm$ 1.3         | <b><i>p</i>&lt;0.001</b>    | 4.3     | 3.8 $\pm$ 2.4         | <i>p</i> =0.634             | 3.5      | 6.3 $\pm$ 5.8         | <i>p</i> =0.214             | 13.6     | 2.5<br>[0.2; 15.8]    | <b><i>p</i>=0.017</b>       | 14.6     | 5.4<br>[3.2; 25.0]    | <i>p</i> =0.098             |
|                                    | RTE<br>(% among Treg)               | 23.1     | 0.6 $\pm$ 0.6         | <b><i>p</i>&lt;0.001</b>    | 2.9     | 1.4 $\pm$ 0.8         | <b><i>p</i>=0.001</b>       | 2.3      | 1.1<br>[0.6; 6.2]     | <i>p</i> =0.161             | 3.5      | 1.1<br>[0.6; 5.2]     | <b><i>p</i>=0.025</b>       | 3.5      | 1.7<br>[0.6; 11.0]    | <i>p</i> =0.161             |
|                                    | Ki67 <sup>+</sup><br>(% among Treg) | 28.4     | 30.5 $\pm$ 19.4       | <i>p</i> =0.820             | 44.8    | 28.3 $\pm$ 9.1        | <b><i>p</i>=0.007</b>       | 31.6     | 25.2 $\pm$ 6.1        | <b><i>p</i>=0.049</b>       | 11.6     | 20.0 $\pm$ 9.0        | <b><i>p</i>=0.049</b>       | 25.6     | 15.3<br>[13.1; 35.9]  | <i>p</i> =0.069             |

<sup>1</sup> Mean  $\pm$  SD are represented for variables normally distributed; median and [min; max] are represented for the variables not normally distributed.

<sup>2</sup> For normally distributed variables, comparison of the control group with the clinical case was performed by one-sample T-test; for the other variables a one-sample Wilcoxon signed rank test was applied. Cells in bold show significant differences (*p*<0.05) between the value of the clinical case and the mean/median of the control group.
